# Supplementary material for: MicroRNA-25-5p negatively regulates TXNIP expression and relieves inflammatory responses of brain induced by lipopolysaccharide
Source: PubMed Central journal article supplement (PMC9605969; doi:10.1038/s41598-022-21169-5), 2022-10-26
Supplement: 41598_2022_21169_MOESM1_ESM.pdf [file 41598_2022_21169_MOESM1_ESM.pdf]

Figure 2B

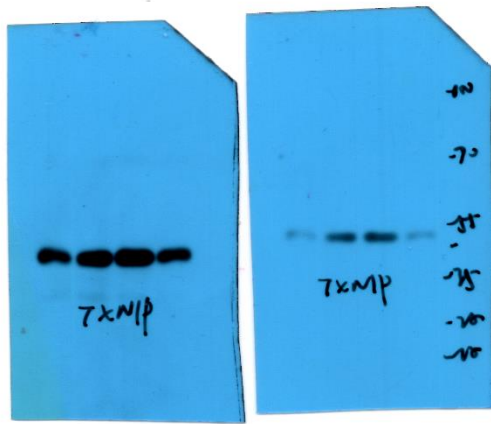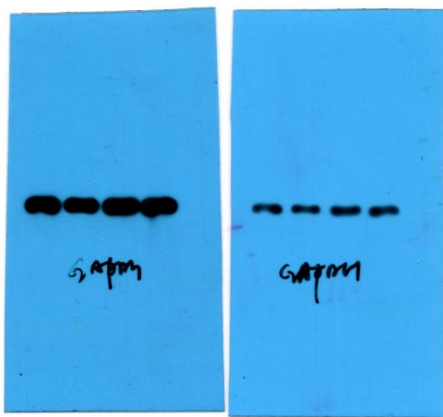

Figure 2E

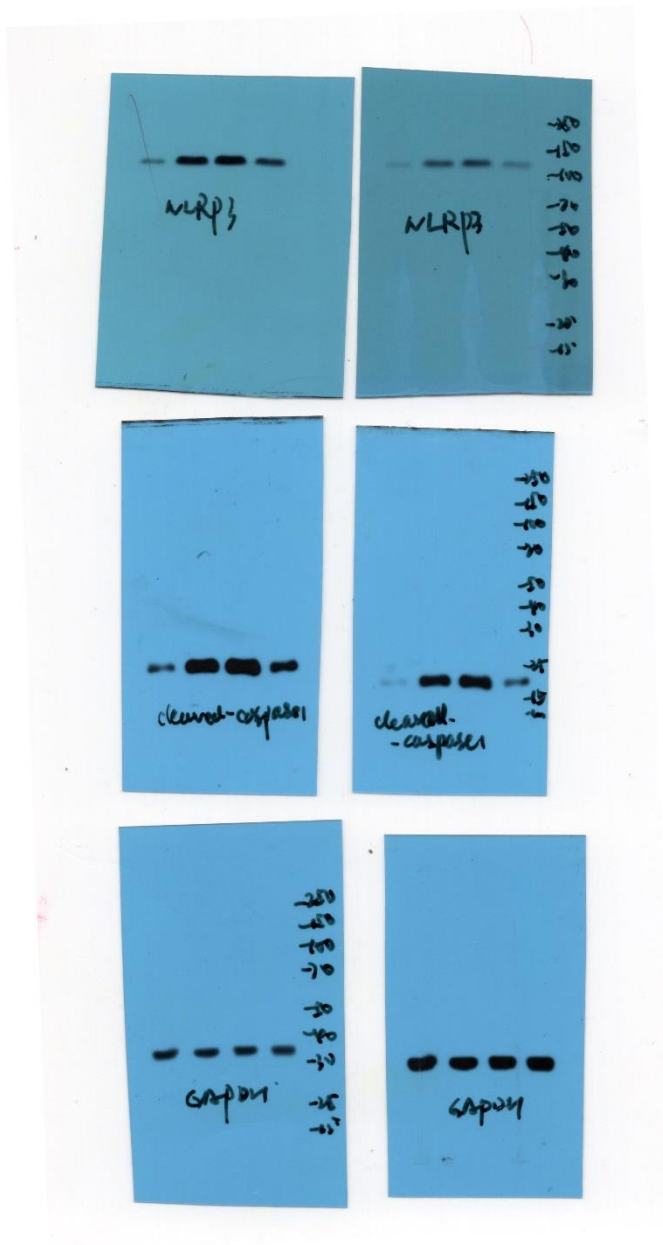

Figure 6B

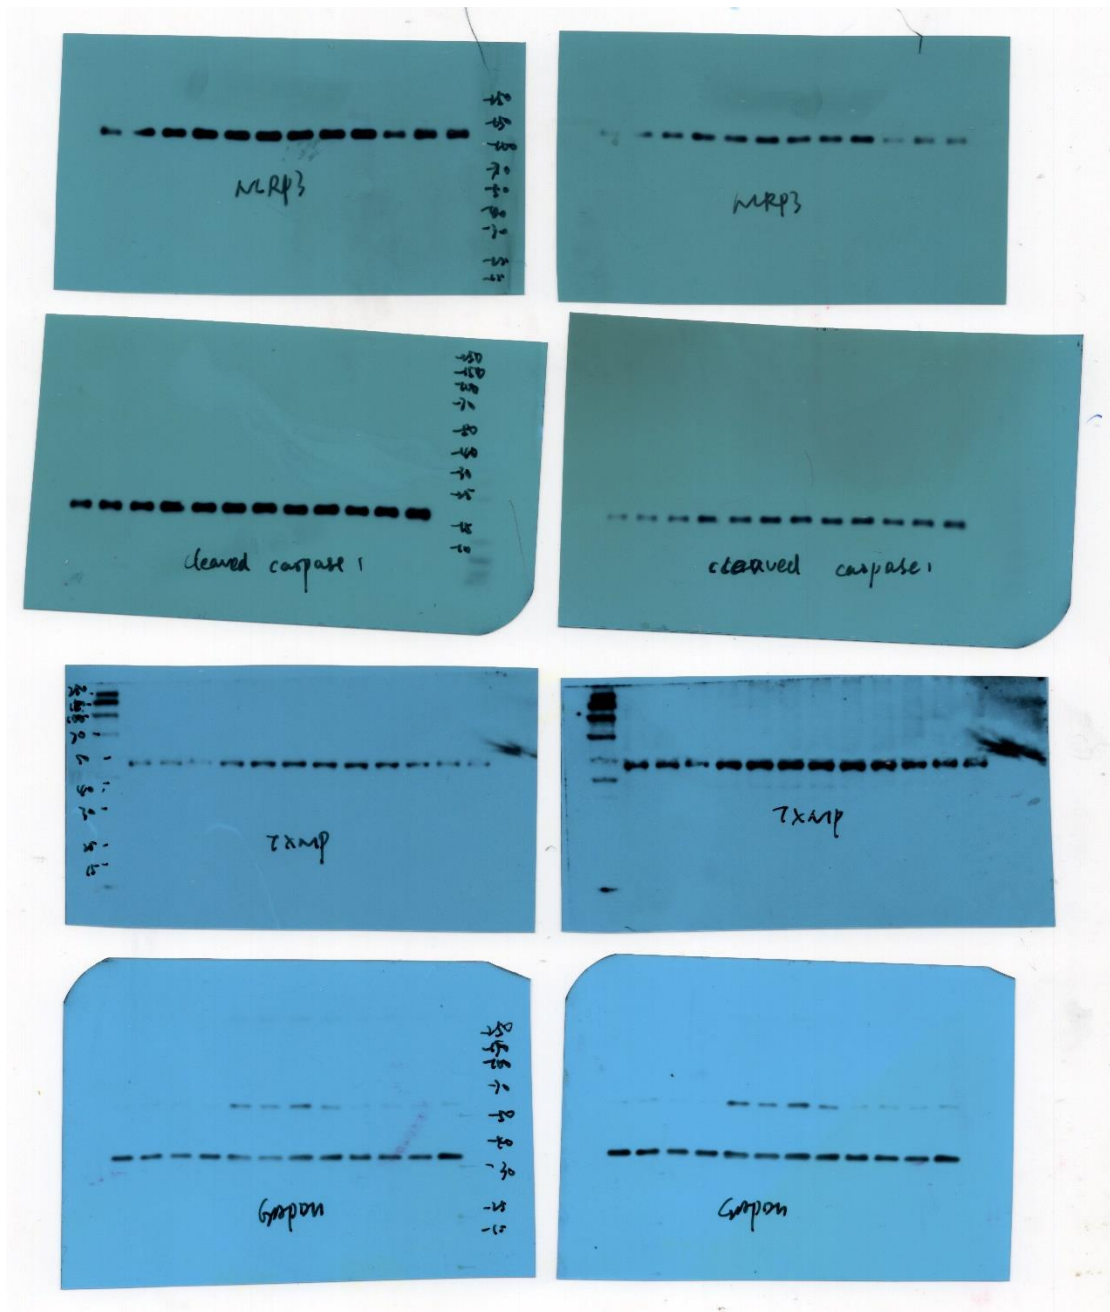

cafoyma

---

cafoyma

---

20  
19  
18  
17  
16  
15  
14  
13  
12  
11  
10

cafoyma

---

10  
11  
12  
13  
14  
15  
16  
17  
18  
19  
20

cafoyma

---
